# Supplementary material for: Evaluation of the PREDIGT score’s performance in identifying newly diagnosed Parkinson’s patients without motor examination
Source: PubMed Central journal article supplement (PMC9338052; doi:10.1038/s41531-022-00360-5), 2022-07-29
Supplement: 41531_2022_360_MOESM1_ESM.pdf [file 41531_2022_360_MOESM1_ESM.pdf]

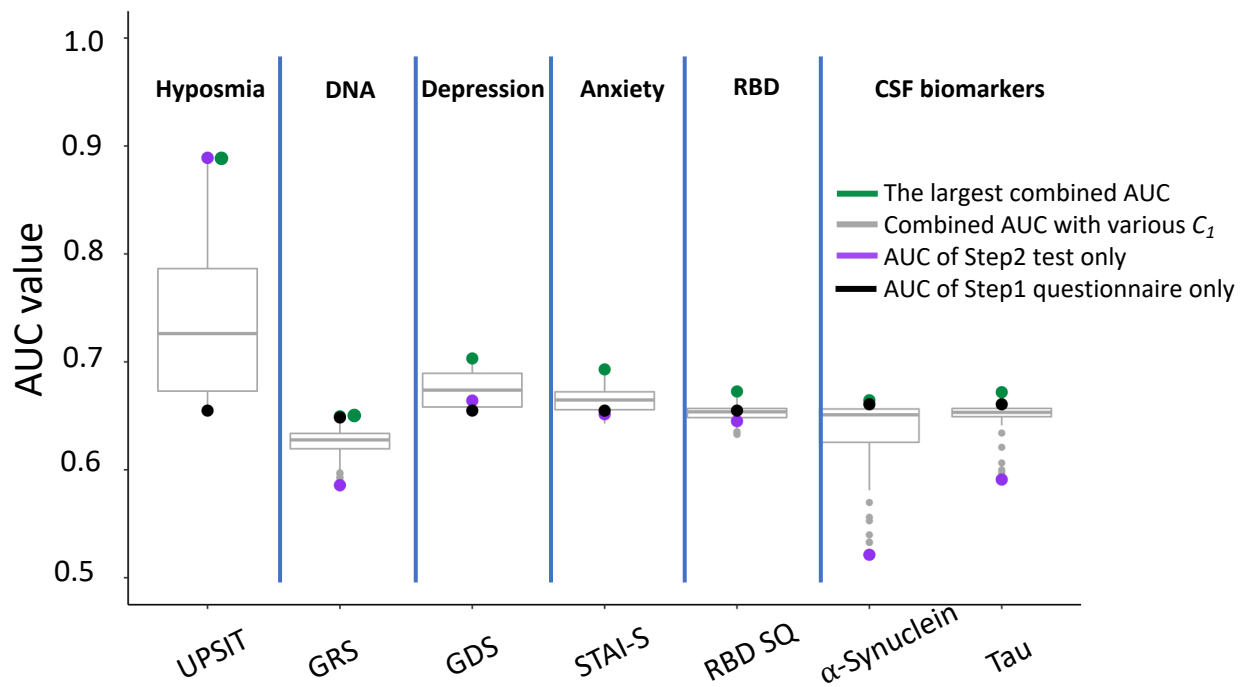

**Supplementary Figure 1: Comparison of outcomes for a screening-adapted version of the PREDIGT Score (*Model 2*) to separate Parkinson’s patients from healthy controls in PPMI.** Box plots illustrate the degree of classification, as depicted by AUC values for Step 1 (PREDIGT Questionnaire score only) and Step 2 (score for one of seven objective test results) and their combination, as color-coded in the inset). The box represents the median and the two middle quartiles (25–75%). Note, for GRS, the largest combined AUC value was equal to the corresponding AUCs of Step 1; and the largest combined AUC value when using UPSIT was the same as the corresponding AUC for the UPSIT test itself. Therefore, we placed extra green dots on top of the corresponding boxplots. Because of missing data, sample sizes in these tests were not identical. Therefore, AUC values of Step 1 (in black) were not identical. AUC, area under the ROC curve; UPSIT, University of Pennsylvania Smell Identification Test; GRS, genetic risk score; GDS, Geriatric Depression Scale; STAI-S, State-Trait Anxiety Inventory-State score; RBD, REM sleep behavior disorder Score Sheet; CSF, cerebrospinal fluid test.

1 **SUPPLEMENTARY TABLES**

2 **Supplementary Table 1:**

3 **Select variables and their previously assigned values within five categories that are entered**  
 4 **into the PREDIGT Score formula [ $P_R=(E+D+I) \times G \times T$ ].**

| <b>Factor</b>                | <b>Assigned value</b> | <b>DeNoPa</b>                                                     | <b>PPMI</b>                          | <b>FOUND</b>  |
|------------------------------|-----------------------|-------------------------------------------------------------------|--------------------------------------|---------------|
| <b>Factor E: Exposome</b>    |                       |                                                                   |                                      |               |
| Metal exposure               | 0.5                   | Self-reported                                                     | n.a.                                 | Self-reported |
| Pesticide exposure/Farm life | 0.25                  | Self-reported                                                     | n.a.                                 | Self-reported |
| Head trauma                  |                       |                                                                   |                                      |               |
| Concussive event(s)          | 1                     | Self-reported                                                     | MH                                   | Self-reported |
| Subconcussive event(s)       | 0.5                   |                                                                   |                                      |               |
| Constipation                 | 0.5                   | MDS UPDRS: 1.11<br>SCOPA AUT: 05, 06<br>PD NMS: 05<br>PD NMSS: 21 | MDS UPDRS: 1.11<br>SCOPA AUT: 05, 06 | PPMI          |
| Reduced olfaction            |                       | PD NMS 02                                                         |                                      |               |
| Anosmia                      | 1                     | PD NMSS 28                                                        |                                      | PPMI          |
| Hyposmia                     | 0.5                   | <b>Sniffin' Sticks 16</b>                                         | <b>UPSIT</b>                         |               |
| Smoking                      |                       |                                                                   |                                      |               |
| Current >= 20 years          | -0.75                 |                                                                   |                                      |               |
| Current 11-19 years          | -0.5                  | Self-reported                                                     | n.a.                                 | Self-reported |
| Past >= 20 years             | -0.25                 |                                                                   |                                      |               |
| Past 11-19 years             | -0.125                |                                                                   |                                      |               |
| Any <= 10 years              | -0.0625               |                                                                   |                                      |               |
| Caffeine intake              |                       |                                                                   |                                      |               |
| >= 2 cups/day recent         | -0.25                 | Self-reported                                                     | n.a.                                 | Self-reported |
| >= 1 cups/day recent         | -0.125                |                                                                   |                                      |               |
| Minimal risk score of 'E'    |                       |                                                                   |                                      |               |
| Age of proband               |                       |                                                                   |                                      |               |
| <= 50 years                  | 0                     |                                                                   |                                      |               |
| 51-59 years                  | 0.005                 |                                                                   |                                      |               |
| 60-69 years                  | 0.0075                |                                                                   |                                      |               |
| 70-79 years                  | 0.02                  |                                                                   |                                      |               |
| >= 80 years                  | 0.03                  |                                                                   |                                      |               |
| <b>Factor D: DNA</b>         |                       |                                                                   |                                      |               |
| Family history of disease    |                       |                                                                   |                                      |               |
| 1st degree relative          | 0.5                   | Self-reported                                                     | Self-reported                        | PPMI          |
| 2nd degree relative          | 0.25                  |                                                                   |                                      |               |
| 3rd degree relative          | 0.125                 |                                                                   |                                      |               |

|                                                |               |                        |                       |      |
|------------------------------------------------|---------------|------------------------|-----------------------|------|
| Minimal risk score of 'D'                      | 0.01          |                        |                       |      |
| <b>Factor I: Initiation of tissue response</b> |               |                        |                       |      |
| Presence of depression                         | 0.25          | MDS UPDRS: 1.3         | MDS UPDRS: 1.3        | PPMI |
|                                                |               | PD NMS: 16             |                       |      |
|                                                |               | PD NMSS: 10            |                       |      |
|                                                |               | UPDRS 1: 3             |                       |      |
|                                                |               | PDQ39: 17              |                       |      |
|                                                |               | <b>GDS; BDI; MADRS</b> | <b>GDS</b>            |      |
| Presence of anxiety                            | 0.25          | MDS UPDRS: 1.4         | MDS UPDRS: 1.4        | PPMI |
|                                                |               | PD NMS: 17             |                       |      |
|                                                |               | PD NMSS: 09            |                       |      |
|                                                |               | PDQ39: 21              |                       |      |
|                                                |               |                        | <b>STAI</b>           |      |
| Presence of RBD                                | 0.25          | PD NMS: 25             |                       | PPMI |
|                                                |               | <b>RBD SQ</b>          | <b>RBD SQ</b>         |      |
| Minimal risk score of 'I'                      |               |                        |                       |      |
| Age of proband                                 |               |                        |                       |      |
| <= 50 years                                    | 0             |                        |                       |      |
| 51-59 years                                    | 0.001         |                        |                       |      |
| 60-69 years                                    | 0.002         |                        |                       |      |
| 70-79 years                                    | 0.003         |                        |                       |      |
| >= 80 years                                    | 0.004         |                        |                       |      |
| <b>Factor G: Gender (Sex)</b>                  |               |                        |                       |      |
| Male                                           | 1.2           | Sex                    | Sex                   | PPMI |
| Female                                         | 0.8           |                        |                       |      |
| <b>Factor T: Time (Age)</b>                    |               |                        |                       |      |
| Age                                            | Subject's age | Age at baseline visit  | Age at baseline visit | PPMI |

5

6 Data collection in DeNoPa and PPMI+FOUND cohorts: most variables were collected using  
7 self-reported questions. Additional instruments/assessments were highlighted in bold. DeNoPa =  
8 *De Novo* Parkinson Study. PPMI = Parkinson's Progression Marker Initiative. FOUND = Follow  
9 Up persons with Neurologic Disease Study. PD = Parkinson's disease. MH = Medical History.  
10 MDS-UPDRS = Movement Disorder Society-Sponsored Revision of the Unified Parkinson's  
11 Disease Rating Scale. Scopa-AUT = Scale for Outcomes in PD for Autonomic Symptoms. PD  
12 NMS = Non-Movement Problems in Parkinson's. PD NMSS = Non-Motor Symptom assessment  
13 scale for Parkinson's Disease. UPSIT = University of Pennsylvania Smell Identification Test.  
14 UPDRS = Unified Parkinson's Disease Rating Scale. GDS = Geriatric Depression Scale (Short  
15 Version). BDI = Beck's Depression Inventory. MADRS = Montgomery-Asberg Depression

- 16 Scale. STAI = State Trait Anxiety Inventory. RBD = REM Sleep Behavior Disorder. RBD SQ =
- 17 The REM Sleep Behavior Disorder Screening Questionnaire.

18 **Supplementary Table 2:**

19 **Questions used in DeNoPa and PPMI regarding five non-motor symptoms entered in the**  
 20 **PREDIGT model.**

| Variable            | Question             | DeNoPa                    |                         | PPMI                    |                         |
|---------------------|----------------------|---------------------------|-------------------------|-------------------------|-------------------------|
|                     |                      | OR (95% CI)               | AUC (95% CI)            | OR (95% CI)             | AUC (95% CI)            |
| <b>Constipation</b> | <b>SCOPA.AUT.06</b>  | <b>4.95 (2.79-8.95)</b>   | <b>0.7 (0.64-0.76)</b>  | <b>4.14 (2.76-6.31)</b> | <b>0.66 (0.63-0.7)</b>  |
|                     | SCOPA.AUT.05         | 4.75 (2.12-11.75)         | 0.61 (0.56-0.65)        | 3.53 (2.16-5.99)        | 0.61 (0.57-0.64)        |
|                     | PD.NMS.05            | 6.48 (2.38-22.15)         | 0.6 (0.55-0.64)         |                         |                         |
|                     | MDS.UPDRS.1.11       | 5.96 (2.18-20.45)         | 0.59 (0.55-0.63)        | 3.51 (2.17-5.9)         | 0.61 (0.57-0.64)        |
|                     | PD.NMSS.21.Severity  | 5.46 (1.78-22.44)         | 0.57 (0.53-0.6)         |                         |                         |
|                     | PD.NMSS.21.Frequency | 5.46 (1.78-22.44)         | 0.57 (0.53-0.6)         |                         |                         |
| <b>Hyposmia</b>     | <b>PD.NMS.02</b>     | <b>14.82 (6.94-34.78)</b> | <b>0.75 (0.71-0.8)</b>  |                         |                         |
|                     | PD.NMSS.28.Severity  | 11.87 (5.56-27.83)        | 0.73 (0.68-0.78)        |                         |                         |
|                     | PD.NMSS.28.Frequency | 14.23 (6.29-36.6)         | 0.74 (0.69-0.79)        |                         |                         |
| <b>Depression</b>   | <b>PDQ39.17</b>      | <b>5.38 (3-9.86)</b>      | <b>0.71 (0.65-0.77)</b> |                         |                         |
|                     | MDS.UPDRS.1.03       | 16.14 (6.13-54)           | 0.69 (0.65-0.74)        | <b>2.24 (1.36-3.8)</b>  | <b>0.56 (0.53-0.59)</b> |
|                     | PD.NMSS.10.Severity  | 8.69 (3.67-23.9)          | 0.66 (0.61-0.7)         |                         |                         |
|                     | PD.NMSS.10.Frequency | 8.69 (3.67-23.9)          | 0.66 (0.61-0.7)         |                         |                         |
|                     | PD.NMS.16            | 4.35 (2.28-8.65)          | 0.64 (0.59-0.7)         |                         |                         |
| <b>Anxiety</b>      | <b>PDQ39.21</b>      | <b>4.48 (2.45-8.43)</b>   | <b>0.68 (0.62-0.74)</b> |                         |                         |
|                     | MDS.UPDRS.1.04       | 8.85 (2.61-46.91)         | 0.59 (0.55-0.62)        | <b>2.31 (1.52-3.57)</b> | <b>0.58 (0.55-0.62)</b> |
|                     | PD.NMSS.09.Severity  | 4.35 (1.67-13.42)         | 0.58 (0.54-0.62)        |                         |                         |
|                     | PD.NMSS.09.Frequency | 4.35 (1.67-13.42)         | 0.58 (0.54-0.62)        |                         |                         |
|                     | PD.NMS.17            | 4.44 (1.21-24.55)         | 0.54 (0.51-0.57)        |                         |                         |
| <b>RBD</b>          | <b>PD.NMS.25</b>     | <b>3.35 (1.64-7.27)</b>   | <b>0.6 (0.55-0.65)</b>  |                         |                         |
|                     | RBD.SQ.06 sum 1-2    | 1.95 (1.09-3.53)          | 0.58 (0.52-0.64)        | <b>1.68 (1.16-2.43)</b> | <b>0.57 (0.53-0.61)</b> |
|                     | RBD.SQ.06 sum 1-4    | 1.75 (0.99-3.12)          | 0.57 (0.51-0.63)        | 1.76 (1.22-2.55)        | 0.57 (0.53-0.62)        |

21 For each variable, the questions were ordered by their AUC values in the DeNoPa cohort. The  
 22 most informative questions were also highlighted by bold.  
 23  
 24

25 **Supplementary Table 3:**

26 **Questions included into Step 1 of Model 2 questionnaire.**

| Factor | Variable                                 | Questionnaire derived from DeNoPa                                                                                                                                        | Questionnaire derived from PPMI                                                                                                                                |
|--------|------------------------------------------|--------------------------------------------------------------------------------------------------------------------------------------------------------------------------|----------------------------------------------------------------------------------------------------------------------------------------------------------------|
| E      | <b>Metal exposure</b>                    | <b>Metal exposure?</b><br>0 = No<br>1 = Yes                                                                                                                              | <b>Metal exposure?</b><br>0 = No<br>1 = Yes                                                                                                                    |
|        | <b>Pesticide exposure/<br/>Farm life</b> | <b>Pesticide/herbicide and/or farm life?</b><br>0 = No<br>1 = Yes                                                                                                        | <b>Pesticide/herbicide and/or farm life?</b><br>0 = No<br>1 = Yes                                                                                              |
|        | <b>Head trauma</b>                       | <b>Severe Head Trauma?</b><br>0 = No<br>1 = Yes, didn't lose consciousness<br>2 = Yes, lost consciousness                                                                | <b>Severe Head Trauma?</b><br>0 = No<br>1 = Yes, didn't lose consciousness<br>2 = Yes, lost consciousness                                                      |
|        | <b>Hyposmia</b>                          | <b>PD.NMS.02</b><br><b>Have you experienced any of the following in the last month?</b><br><b>Loss or change in your ability to taste or smell.</b><br>0 = No<br>1 = Yes | n.a                                                                                                                                                            |
|        | <b>Constipation</b>                      | <b>SCOPA.AUT.06</b><br><b>In the past month, did you have to strain hard to pass stools?</b><br>0 = never<br>1 = sometimes<br>2 = regularly<br>3 = often                 | <b>SCOPA.AUT.06</b><br><b>In the past month, did you have to strain hard to pass stools?</b><br>0 = never<br>1 = sometimes<br>2 = regularly<br>3 = often       |
|        | <b>Smoking</b>                           | <b>Smoking history:</b><br>0 = No<br>1 = Any <= 10 years<br>2 = Past 11-19 years<br>3 = Past >= 20 years<br>4 = Current 11-19 years<br>5 = Current >= 20 years           | <b>Smoking history:</b><br>0 = No<br>1 = Any <= 10 years<br>2 = Past 11-19 years<br>3 = Past >= 20 years<br>4 = Current 11-19 years<br>5 = Current >= 20 years |
|        | <b>Caffeine intake</b>                   | <b>Caffeinated beverage intake:</b><br>0 = No<br>1 = over 1 cups/day recent<br>2 = over 2 cups/day recent                                                                | <b>Caffeinated beverage intake:</b><br>0 = No<br>1 = over 1 cups/day recent<br>2 = over 2 cups/day recent                                                      |
| D      | <b>Family history</b>                    | <b>Family history of PD:</b><br>1 = 1st degree relative<br>2 = 2nd degree relative<br>3 = 3rd degree relative                                                            | <b>Family history of PD:</b><br>1 = 1st degree relative<br>2 = 2nd degree relative<br>3 = 3rd degree relative                                                  |

|   |            |                                                                                                                                                                                                                                                                                                                                                 |                                                                                                                                                                                                                                                                                                                                                                                                                                                                                                                                                                                                                                                                                                                                                                                                                                                                                                                                                                                                                                                                                              |
|---|------------|-------------------------------------------------------------------------------------------------------------------------------------------------------------------------------------------------------------------------------------------------------------------------------------------------------------------------------------------------|----------------------------------------------------------------------------------------------------------------------------------------------------------------------------------------------------------------------------------------------------------------------------------------------------------------------------------------------------------------------------------------------------------------------------------------------------------------------------------------------------------------------------------------------------------------------------------------------------------------------------------------------------------------------------------------------------------------------------------------------------------------------------------------------------------------------------------------------------------------------------------------------------------------------------------------------------------------------------------------------------------------------------------------------------------------------------------------------|
| I | Depression | <p><b>PDQ39.17</b><br/> <b>Due to having Parkinson’s disease, how often during the last month have you felt depressed?</b><br/>                     0 = never<br/>                     1 = Occasionally<br/>                     2 = Sometimes<br/>                     3 = Often<br/>                     4 = Always (or cannot do at all)</p> | <p><b>MDS.UPDRS.1.03</b><br/> <b>DEPRESSED MOOD</b><br/> <b>Over the past week have you felt low, sad, hopeless, or unable to enjoy things? If yes, was this feeling for longer than one day at a time? Did it make it difficult for you carry out your usual activities or to be with people?</b><br/>                     0: Normal: No depressed mood.<br/>                     1: Slight: Episodes of depressed mood that are not sustained for more than one day at a time. No interference with patient’s ability to carry out normal activities and social interactions.<br/>                     2: Mild: Depressed mood that is sustained over days, but without interference with normal activities and social interactions.<br/>                     3: Moderate: Depressed mood that interferes with, but does not preclude the patient’s ability to carry out normal activities and social interactions.<br/>                     4: Severe: Depressed mood precludes patient’s ability to carry out normal activities and social interactions.</p>                             |
|   | Anxiety    | <p><b>PDQ39.21</b><br/> <b>Due to having Parkinson’s disease, how often during the last month have you felt anxious?</b><br/>                     0 = never<br/>                     1 = Occasionally<br/>                     2 = Sometimes<br/>                     3 = Often<br/>                     4 = Always (or cannot do at all)</p>   | <p><b>MDS.UPDRS.1.04</b><br/> <b>ANXIOUS MOOD</b><br/> <b>Over the past week have you felt nervous, worried, or tense? If yes, was this feeling for longer than one day at a time? Did it make it difficult for you to follow your usual activities or to be with other people?</b><br/>                     0: Normal: No anxious feelings.<br/>                     1: Slight: Anxious feelings present but not sustained for more than one day at a time. No interference with patient’s ability to carry out normal activities and social interactions.<br/>                     2: Mild: Anxious feelings are sustained over more than one day at a time, but without interference with patient’s ability to carry out normal activities and social interactions.<br/>                     3: Moderate: Anxious feelings interfere with, but do not preclude, the patient’s ability to carry out normal activities and social interactions.<br/>                     4: Severe: Anxious feelings preclude patient’s ability to carry out normal activities and social interactions.</p> |
|   | RBD        | <p><b>PD.NMS.25</b><br/> <b>Have you experienced any of the following in the last month?</b><br/> <b>Talking or moving about in your sleep as if you are 'acting' out a dream.</b><br/>                     0 = No<br/>                     1 = Yes</p>                                                                                         | <p><b>RBD.SQ.6.1 and 6.2</b><br/> <b>I have or had the following phenomena during my dreams:</b><br/> <b>6.1. speaking, shouting, swearing, laughing loudly</b><br/> <b>6.2. sudden limb movements, “fights”</b><br/>                     0 = No<br/>                     1 = Yes</p>                                                                                                                                                                                                                                                                                                                                                                                                                                                                                                                                                                                                                                                                                                                                                                                                        |
| G | Sex        | <p><b>Biological sex:</b><br/>                     1 = Female<br/>                     2 = Male</p>                                                                                                                                                                                                                                             | <p><b>Biological sex:</b><br/>                     1 = Female<br/>                     2 = Male</p>                                                                                                                                                                                                                                                                                                                                                                                                                                                                                                                                                                                                                                                                                                                                                                                                                                                                                                                                                                                          |
| T | Age        | <p><b>Participant’s age at baseline visit.</b></p>                                                                                                                                                                                                                                                                                              | <p><b>Participant’s age at baseline visit.</b></p>                                                                                                                                                                                                                                                                                                                                                                                                                                                                                                                                                                                                                                                                                                                                                                                                                                                                                                                                                                                                                                           |

28 **Supplementary Table 4:**

29 **Candidate objective tests for Step 2 in Model 2.**

| Factor | Variable       | Objective tests used in DeNoPa                                                                                        | Objective tests used in PPMI                                     |
|--------|----------------|-----------------------------------------------------------------------------------------------------------------------|------------------------------------------------------------------|
| E      | Hyposmia       | Sniffin' Sticks                                                                                                       | University of Pennsylvania Smell Identification Test (UPSIT)     |
| D      | DNA            | n.a.                                                                                                                  | Genetic Risk Score (GRS)                                         |
| I      | Depression     | Geriatric Depression Scale (GDS);<br>Beck's Depression Inventory (BDI);<br>Montgomery-Asberg Depression Scale (MADRS) | Geriatric Depression Scale (GDS)                                 |
|        | Anxiety        | n.a.                                                                                                                  | State Trait Anxiety Inventory State (STAI-S)                     |
|        | RBD            | The REM Sleep Behavior Disorder Screening Questionnaire (RBD SQ)                                                      | The REM Sleep Behavior Disorder Screening Questionnaire (RBD SQ) |
|        | CSF biomarkers | $\alpha$ -synuclein<br>Tau                                                                                            | $\alpha$ -synuclein<br>Tau                                       |

30
